# Supplementary material for: Smoking, Blood Pressure, and Cardiovascular Disease Mortality in a Large Cohort of Chinese Men with 15 Years Follow-up
Source: PubMed Central journal article supplement (PMC5982065; doi:10.3390/ijerph15051026), 2018-05-18
Supplement: ijerph-15-01026-s001.pdf [file ijerph-15-01026-s001.pdf]

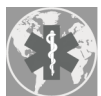

Supplementary Materials

# Smoking, Blood Pressure, and Cardiovascular Disease Mortality in a Large Cohort of Chinese Men with 15 Years Follow-up

Jibin Tan, Xiumin Zhang, Weihua Wang, Peng Yin, Xiaomin Guo and Maigeng Zhou

**Table S1.** Joint effects of smoking and blood pressure level on the risk of all-cause mortality\*.

| Pack years | normal          | PH              | HP              |
|------------|-----------------|-----------------|-----------------|
| 0          | 1.00            | 1.16(1.11-1.21) | 1.43(1.35-1.51) |
| 0.1-19     | 1.19(1.12-1.26) | 1.30(1.24-1.37) | 1.73(1.63-1.83) |
| ≥20        | 1.28(1.23-1.35) | 1.38(1.32-1.44) | 1.69(1.61-1.77) |

**Table S2.** Joint effects of smoking and blood pressure level on the risk of CVD mortality\*.

| Pack years | normal          | PH              | HP              |
|------------|-----------------|-----------------|-----------------|
| 0          | 1.00            | 1.33(1.22-1.44) | 2.05(1.87-2.25) |
| 0.1-19     | 1.10(0.98-1.22) | 1.50(1.37-1.63) | 2.55(2.31-2.81) |
| ≥20        | 1.18(1.08-1.29) | 1.52(1.40-1.64) | 2.30(2.12-2.50) |

**Table S3.** Joint effects of smoking and blood pressure level on the risk of IHD mortality\*.

| Pack years | normal          | PH              | HP              |
|------------|-----------------|-----------------|-----------------|
| 0          | 1.00            | 1.21(1.02-1.45) | 1.49(1.22-1.82) |
| 0.1-19     | 1.18(0.94-1.48) | 1.35(1.12-1.62) | 1.98(1.60-2.46) |
| ≥20        | 1.30(1.08-1.56) | 1.47(1.24-1.74) | 1.78(1.48-2.14) |

**Table S4.** Joint effects of smoking and blood pressure level on the risk of stroke mortality\*.

| Pack years | normal          | PH              | HP              |
|------------|-----------------|-----------------|-----------------|
| 0          | 1.00            | 1.41(1.26-1.58) | 2.55(2.26-2.88) |
| 0.1-19     | 1.09(0.94-1.26) | 1.64(1.46-1.84) | 3.07(2.69-3.49) |
| ≥20        | 1.16(1.03-1.31) | 1.65(1.49-1.84) | 2.74(2.45-3.07) |

\*Hazard ratios against blood pressure levels (Normal = normal blood pressure, PH = prehypertension, HP = hypertension) and pack years of smoking (0, 0.1–19, ≥20) adjusted for age, educational level, marital status, indoor air pollution, consumption of fruit and vegetables, alcohol drinking, urbanicity, and region).

APPENDENCIES

Tables including HR (and CI) for all variables in a given model

**Joint effects of smoking and blood pressure level**

**Table a1.** Joint effects of smoking and blood pressure level on the risk of all-cause mortality\*.

| variable | Degree of Freedom | estimates | standard means | chisq    | Sig.   | HR    | 95% CI      |
|----------|-------------------|-----------|----------------|----------|--------|-------|-------------|
| joint 1  | 1                 | 0.17179   | 0.0291         | 34.8523  | <.0001 | 1.187 | 1.122 1.257 |
| joint 2  | 1                 | 0.25052   | 0.02346        | 114.0087 | <.0001 | 1.285 | 1.227 1.345 |
| joint 3  | 1                 | 0.14796   | 0.02337        | 40.0754  | <.0001 | 1.159 | 1.108 1.214 |
| joint 4  | 1                 | 0.26349   | 0.02476        | 113.2903 | <.0001 | 1.301 | 1.24 1.366  |
| joint 5  | 1                 | 0.32208   | 0.0217         | 220.2302 | <.0001 | 1.38  | 1.323 1.44  |
| joint 6  | 1                 | 0.3567    | 0.02776        | 165.1383 | <.0001 | 1.429 | 1.353 1.508 |
| joint 7  | 1                 | 0.54612   | 0.03079        | 314.6645 | <.0001 | 1.727 | 1.625 1.834 |
| joint 8  | 1                 | 0.52368   | 0.02413        | 470.8854 | <.0001 | 1.688 | 1.61 1.77   |
| DRALC    | 1                 | -0.1016   | 0.01405        | 52.2597  | <.0001 | 0.903 | 0.879 0.929 |
| units    | 1                 | 0.0025    | 0.000302       | 68.58    | <.0001 | 1.003 | 1.002 1.003 |
| BMI      | 1                 | -0.0241   | 0.00188        | 164.4302 | <.0001 | 0.976 | 0.973 0.98  |
| iap      | 1                 | 0.4778    | 0.01908        | 627.3158 | <.0001 | 1.613 | 1.553 1.674 |
| edugroup | 1                 | -0.20955  | 0.0134         | 244.4005 | <.0001 | 0.811 | 0.79 0.833  |
| MARRIED  | 1                 | -0.10876  | 0.01359        | 64.0631  | <.0001 | 0.897 | 0.873 0.921 |
| fvgroup  | 1                 | -0.1499   | 0.01143        | 172.1345 | <.0001 | 0.861 | 0.842 0.88  |

| test of null hypothesis: BETA=0 |          |    |            |
|---------------------------------|----------|----|------------|
| test                            | chisq    | df | Pr > chisq |
| likelihood ratio                | 2871.129 | 15 | <.0001     |
| score                           | 2760.165 | 15 | <.0001     |
| Wald                            | 2735.978 | 15 | <.0001     |

**Table a2.** Joint effects of smoking and blood pressure level on the risk of CVD mortality\*.

| variable | DF | estimates | standard means | chisq    | Sig.   | HR    | 95% CI      |
|----------|----|-----------|----------------|----------|--------|-------|-------------|
| joint 1  | 1  | 0.09283   | 0.0551         | 2.8383   | 0.092  | 1.097 | 0.985 1.222 |
| joint 2  | 1  | 0.16698   | 0.04404        | 14.3735  | 0.0001 | 1.182 | 1.084 1.288 |
| joint 3  | 1  | 0.28386   | 0.04211        | 45.4438  | <.0001 | 1.328 | 1.223 1.443 |
| joint 4  | 1  | 0.40404   | 0.04422        | 83.5051  | <.0001 | 1.498 | 1.374 1.633 |
| joint 5  | 1  | 0.41643   | 0.0397         | 110.0063 | <.0001 | 1.517 | 1.403 1.639 |
| joint 6  | 1  | 0.71788   | 0.04645        | 238.9018 | <.0001 | 2.05  | 1.872 2.245 |
| joint 7  | 1  | 0.93428   | 0.04992        | 350.304  | <.0001 | 2.545 | 2.308 2.807 |
| joint 8  | 1  | 0.8334    | 0.0423         | 388.0931 | <.0001 | 2.301 | 2.118 2.5   |
| DRALC    | 1  | -0.1169   | 0.02365        | 24.4375  | <.0001 | 0.89  | 0.849 0.932 |
| units    | 1  | 0.00353   | 0.000511       | 47.937   | <.0001 | 1.004 | 1.003 1.005 |
| BMI      | 1  | 0.00782   | 0.00304        | 6.6333   | 0.01   | 1.008 | 1.002 1.014 |
| iap      | 1  | 0.55509   | 0.03271        | 288.031  | <.0001 | 1.742 | 1.634 1.857 |
| edugroup | 1  | -0.16446  | 0.02262        | 52.8427  | <.0001 | 0.848 | 0.812 0.887 |
| MARRIED  | 1  | -0.12209  | 0.02226        | 30.0716  | <.0001 | 0.885 | 0.847 0.925 |
| fvgroup  | 1  | -0.0929   | 0.01912        | 23.6029  | <.0001 | 0.911 | 0.878 0.946 |

| test of null hypothesis: BETA=0 |          |    |            |
|---------------------------------|----------|----|------------|
| test                            | chisq    | df | Pr > chisq |
| likelihood ratio                | 1679.388 | 15 | <.0001     |
| score                           | 1708.052 | 15 | <.0001     |
| Wald                            | 1671.714 | 15 | <.0001     |

**Table a3.** Joint effects of smoking and blood pressure level on the risk of IHD mortality\*.

| variable | DF | estimates | standard means | chisq   | Sig.   | HR    | 95% CI |       |
|----------|----|-----------|----------------|---------|--------|-------|--------|-------|
| joint 1  | 1  | 0.16357   | 0.11535        | 2.0109  | 0.1562 | 1.178 | 0.939  | 1.476 |
| joint 2  | 1  | 0.26037   | 0.09468        | 7.5626  | 0.006  | 1.297 | 1.078  | 1.562 |
| joint 3  | 1  | 0.19266   | 0.09022        | 4.5606  | 0.0327 | 1.212 | 1.016  | 1.447 |
| joint 4  | 1  | 0.2995    | 0.0946         | 10.0226 | 0.0015 | 1.349 | 1.121  | 1.624 |
| joint 5  | 1  | 0.38338   | 0.08554        | 20.0876 | <.0001 | 1.467 | 1.241  | 1.735 |
| joint 6  | 1  | 0.39791   | 0.102          | 15.2178 | <.0001 | 1.489 | 1.219  | 1.818 |
| joint 7  | 1  | 0.68475   | 0.10917        | 39.3393 | <.0001 | 1.983 | 1.601  | 2.456 |
| joint 8  | 1  | 0.57668   | 0.09329        | 38.2127 | <.0001 | 1.78  | 1.483  | 2.137 |
| DRALC    | 1  | -0.17411  | 0.05423        | 10.3065 | 0.0013 | 0.84  | 0.755  | 0.934 |
| units    | 1  | 0.00191   | 0.00131        | 2.1216  | 0.1452 | 1.002 | 0.999  | 1.004 |
| BMI      | 1  | 0.01485   | 0.00649        | 5.2398  | 0.0221 | 1.015 | 1.002  | 1.028 |
| iap      | 1  | 0.31792   | 0.06115        | 27.0299 | <.0001 | 1.374 | 1.219  | 1.549 |
| edugroup | 1  | 0.03006   | 0.04623        | 0.4226  | 0.5156 | 1.031 | 0.941  | 1.128 |
| MARRIED  | 1  | -0.26991  | 0.04853        | 30.9368 | <.0001 | 0.763 | 0.694  | 0.84  |
| fvgroup  | 1  | 0.03273   | 0.04145        | 0.6233  | 0.4298 | 1.033 | 0.953  | 1.121 |

| test of null hypothesis: BETA=0 |          |    |            |
|---------------------------------|----------|----|------------|
| test                            | chisq    | df | Pr > chisq |
| likelihood ratio                | 153.5132 | 15 | <.0001     |
| score                           | 156.4693 | 15 | <.0001     |
| Wald                            | 155.2092 | 15 | <.0001     |

**Table a4.** Joint effects of smoking and blood pressure level on the risk of stroke mortality\*.

| variable | DF | estimates | standard means | chisq    | Sig.   | HR    | 95% CI |       |
|----------|----|-----------|----------------|----------|--------|-------|--------|-------|
| joint 1  | 1  | 0.08596   | 0.07524        | 1.3051   | 0.2533 | 1.09  | 0.94   | 1.263 |
| joint 2  | 1  | 0.14858   | 0.06086        | 5.9603   | 0.0146 | 1.16  | 1.03   | 1.307 |
| joint 3  | 1  | 0.34673   | 0.05772        | 36.0854  | <.0001 | 1.414 | 1.263  | 1.584 |
| joint 4  | 1  | 0.49363   | 0.05986        | 68.0104  | <.0001 | 1.638 | 1.457  | 1.842 |
| joint 5  | 1  | 0.50333   | 0.05445        | 85.4606  | <.0001 | 1.654 | 1.487  | 1.841 |
| joint 6  | 1  | 0.93519   | 0.06202        | 227.4046 | <.0001 | 2.548 | 2.256  | 2.877 |
| joint 7  | 1  | 1.12019   | 0.06589        | 289.0214 | <.0001 | 3.065 | 2.694  | 3.488 |
| joint 8  | 1  | 1.00861   | 0.0573         | 309.8864 | <.0001 | 2.742 | 2.451  | 3.068 |
| DRALC    | 1  | -0.09474  | 0.03039        | 9.7195   | 0.0018 | 0.91  | 0.857  | 0.965 |
| units    | 1  | 0.00437   | 0.000644       | 45.9088  | <.0001 | 1.004 | 1.003  | 1.006 |
| BMI      | 1  | 0.01389   | 0.00393        | 12.462   | 0.0004 | 1.014 | 1.006  | 1.022 |
| iap      | 1  | 0.66719   | 0.04513        | 218.528  | <.0001 | 1.949 | 1.784  | 2.129 |
| edugroup | 1  | -0.22624  | 0.02997        | 56.97    | <.0001 | 0.798 | 0.752  | 0.846 |
| MARRIED  | 1  | -0.06275  | 0.02927        | 4.5954   | 0.0321 | 0.939 | 0.887  | 0.995 |
| fvgroup  | 1  | -0.14927  | 0.02518        | 35.1395  | <.0001 | 0.861 | 0.82   | 0.905 |

| test of null hypothesis: BETA=0 |          |    |            |
|---------------------------------|----------|----|------------|
| test                            | chisq    | df | Pr > chisq |
| likelihood ratio                | 1542.29  | 15 | <.0001     |
| score                           | 1578.227 | 15 | <.0001     |
| Wald                            | 1527.017 | 15 | <.0001     |

\*from Table a1 to Table a4, joint is the interaction between blood pressure and smoking status, joint 1–8 represent categories as follow in Table aa1. DRALC represents drinking alcohol regularly (0 = no (reference), 1 = yes), units represents the amount of drinking (drink, one drink is about 14g of pure

alcohol), BMI equals to weight (Kg)/height (m)<sup>2</sup>, iap represents indoor air pollution (0 = not exposed to indoor pollution (reference), 1 = exposed to indoor pollution), edugroup represents education level (0 = less than six years (reference), 1 = equal to or more than six years), married represents marital status (0 = not married (reference), 1 = married), fvgroup represents consumption of fruit and vegetables regularly (0 = no (reference), 1 = yes).

**Table aa1.** Categories of interaction between blood pressure and smoking status.

|            |        | Blood pressure        |                 |              |
|------------|--------|-----------------------|-----------------|--------------|
|            |        | normal blood pressure | prehypertension | hypertension |
| Pack years | 0      | reference             | Joint 3         | Joint 6      |
|            | 0.1–19 | Joint1                | Joint 4         | Joint 7      |
|            | ≥20    | Joint 2               | Joint 5         | Joint 8      |

### Pack years

**Table b1.** Pack years of smoking on the risk of all cause mortality#.

| variable      | DF | estimates | standard means | chisq    | Sig.     | HR     | 95% CI |       |       |
|---------------|----|-----------|----------------|----------|----------|--------|--------|-------|-------|
| pack years    | 1  | 1         | 0.1405         | 0.01424  | 97.3866  | <.0001 | 1.151  | 1.119 | 1.183 |
| pack years    | 2  | 1         | 0.1897         | 0.01129  | 282.4784 | <.0001 | 1.209  | 1.182 | 1.236 |
| hypertension1 | 1  | 0.21795   | 0.00992        | 482.6476 | <.0001   | 1.244  | 1.22   | 1.268 |       |
| DRALC         | 1  | -0.10129  | 0.01405        | 51.949   | <.0001   | 0.904  | 0.879  | 0.929 |       |
| units         | 1  | 0.00249   | 0.000302       | 67.8777  | <.0001   | 1.002  | 1.002  | 1.003 |       |
| BMI           | 1  | -0.02355  | 0.00187        | 157.9332 | <.0001   | 0.977  | 0.973  | 0.98  |       |
| iap           | 1  | 0.48067   | 0.01908        | 634.9922 | <.0001   | 1.617  | 1.558  | 1.679 |       |
| edugroup      | 1  | -0.20975  | 0.01341        | 244.7743 | <.0001   | 0.811  | 0.79   | 0.832 |       |
| MARRIED       | 1  | -0.10834  | 0.01359        | 63.5683  | <.0001   | 0.897  | 0.874  | 0.922 |       |
| fvgroup       | 1  | -0.14982  | 0.01143        | 171.906  | <.0001   | 0.861  | 0.842  | 0.88  |       |

| test of null hypothesis: BETA=0 |          |    |            |
|---------------------------------|----------|----|------------|
| test                            | chisq    | df | Pr > chisq |
| likelihood ratio                | 2829.231 | 10 | <.0001     |
| score                           | 2712.749 | 10 | <.0001     |
| Wald                            | 2692.885 | 10 | <.0001     |

**Table b2.** Pack years of smoking on the risk of CVD #.

| variable      | DF | estimates | standard means | chisq    | Sig.    | HR     | 95% CI |       |       |
|---------------|----|-----------|----------------|----------|---------|--------|--------|-------|-------|
| pack years    | 1  | 1         | 0.13477        | 0.02343  | 33.0809 | <.0001 | 1.144  | 1.093 | 1.198 |
| pack years    | 2  | 1         | 0.13398        | 0.01877  | 50.9305 | <.0001 | 1.143  | 1.102 | 1.186 |
| hypertension1 | 1  | 0.4686    | 0.01624        | 832.1268 | <.0001  | 1.598  | 1.548  | 1.649 |       |
| DRALC         | 1  | -0.1176   | 0.02364        | 24.752   | <.0001  | 0.889  | 0.849  | 0.931 |       |
| units         | 1  | 0.00356   | 0.00051        | 48.8489  | <.0001  | 1.004  | 1.003  | 1.005 |       |
| BMI           | 1  | 0.00961   | 0.00303        | 10.0828  | 0.0015  | 1.01   | 1.004  | 1.016 |       |
| iap           | 1  | 0.56076   | 0.03271        | 293.9562 | <.0001  | 1.752  | 1.643  | 1.868 |       |
| edugroup      | 1  | -0.16521  | 0.02263        | 53.2801  | <.0001  | 0.848  | 0.811  | 0.886 |       |
| MARRIED       | 1  | -0.1221   | 0.02226        | 30.0829  | <.0001  | 0.885  | 0.847  | 0.925 |       |
| fvgroup       | 1  | -0.09336  | 0.01913        | 23.8203  | <.0001  | 0.911  | 0.877  | 0.946 |       |

| test of null hypothesis: BETA=0 |          |    |            |
|---------------------------------|----------|----|------------|
| test                            | chisq    | df | Pr > chisq |
| likelihood ratio                | 1552.076 | 10 | <.0001     |
| score                           | 1547.211 | 10 | <.0001     |
| Wald                            | 1525.77  | 10 | <.0001     |

**Table b3.** Pack years of smoking on the risk of IHD #.

| variable      | DF | estimates | standard means | chisq   | Sig.    | HR     | 95% CI            |
|---------------|----|-----------|----------------|---------|---------|--------|-------------------|
| pack years    | 1  | 1         | 0.15967        | 0.0508  | 9.8801  | 0.0017 | 1.173 1.062 1.296 |
| pack years    | 2  | 1         | 0.20115        | 0.04162 | 23.3588 | <.0001 | 1.223 1.127 1.327 |
| hypertension1 | 1  | 1         | 0.25275        | 0.03632 | 48.4393 | <.0001 | 1.288 1.199 1.383 |
| DRALC         | 1  | 1         | -0.17455       | 0.05422 | 10.3643 | 0.0013 | 0.84 0.755 0.934  |
| units         | 1  | 1         | 0.00192        | 0.00131 | 2.1615  | 0.1415 | 1.002 0.999 1.004 |
| BMI           | 1  | 1         | 0.01566        | 0.00647 | 5.8525  | 0.0156 | 1.016 1.003 1.029 |
| iap           | 1  | 1         | 0.32104        | 0.06115 | 27.5603 | <.0001 | 1.379 1.223 1.554 |
| edugroup      | 1  | 1         | 0.02808        | 0.04624 | 0.3689  | 0.5436 | 1.028 0.939 1.126 |
| MARRIED       | 1  | 1         | -0.26996       | 0.04852 | 30.9534 | <.0001 | 0.763 0.694 0.84  |
| fvgroup       | 1  | 1         | 0.03329        | 0.04146 | 0.6446  | 0.422  | 1.034 0.953 1.121 |

| test of null hypothesis: BETA=0 |          |    |            |
|---------------------------------|----------|----|------------|
| test                            | chisq    | df | Pr > chisq |
| likelihood ratio                | 145.298  | 10 | <.0001     |
| score                           | 146.9133 | 10 | <.0001     |
| Wald                            | 146.3002 | 10 | <.0001     |

**Table b4.** Pack years of smoking on the risk of Stroke #.

| variable      | DF | estimates | standard means | chisq    | Sig.     | HR     | 95% CI            |
|---------------|----|-----------|----------------|----------|----------|--------|-------------------|
| pack years    | 1  | 1         | 0.13782        | 0.03033  | 20.6479  | <.0001 | 1.148 1.082 1.218 |
| pack years    | 2  | 1         | 0.1292         | 0.02454  | 27.722   | <.0001 | 1.138 1.084 1.194 |
| hypertension1 | 1  | 1         | 0.58096        | 0.02108  | 759.8875 | <.0001 | 1.788 1.715 1.863 |
| DRALC         | 1  | 1         | -0.09636       | 0.03038  | 10.0633  | 0.0015 | 0.908 0.856 0.964 |
| units         | 1  | 1         | 0.00443        | 0.000644 | 47.2566  | <.0001 | 1.004 1.003 1.006 |
| BMI           | 1  | 1         | 0.01645        | 0.00392  | 17.5759  | <.0001 | 1.017 1.009 1.024 |
| iap           | 1  | 1         | 0.67419        | 0.04513  | 223.187  | <.0001 | 1.962 1.796 2.144 |
| edugroup      | 1  | 1         | -0.22685       | 0.02999  | 57.2273  | <.0001 | 0.797 0.752 0.845 |
| MARRIED       | 1  | 1         | -0.06302       | 0.02927  | 4.6362   | 0.0313 | 0.939 0.887 0.994 |
| fvgroup       | 1  | 1         | -0.15016       | 0.02519  | 35.5235  | <.0001 | 0.861 0.819 0.904 |

| test of null hypothesis: BETA=0 |          |    |            |
|---------------------------------|----------|----|------------|
| test                            | chisq    | df | Pr > chisq |
| likelihood ratio                | 1383.749 | 10 | <.0001     |
| score                           | 1383.016 | 10 | <.0001     |
| Wald                            | 1353.922 | 10 | <.0001     |

#from Table b1 to Table b4, pack years 1 = 0.1–19 pack years, pack years 2 = equal to or more than 20 pack years, hypertension1 = (0 = normotensive, 1 = hypertension), DRALC represents drinking alcohol regularly (0 = no (reference), 1 = yes), units represents the amount of drinking (drink, one drink is about 14g of pure alcohol), BMI equals to weight (Kg)/height (m)<sup>2</sup>, iap represents indoor air pollution (0 = not exposed to indoor pollution (reference), 1 = exposed to indoor pollution), edugroup represents education level (0 = less than six years (reference), 1 = equal to or more than six years), married represents marital status (0 = not married (reference), 1 = married), fvgroup represents consumption of fruit and vegetables regularly (0 = no (reference), 1 = yes).

### 10mmHg increase in baseline SBP and DBP

**Table c1.** 10mmHg increase in baseline SBP on the risk of all cause mortality.

| variable | DF | estimates | standard means | chisq | Sig. | HR | 95% CI |
|----------|----|-----------|----------------|-------|------|----|--------|
|----------|----|-----------|----------------|-------|------|----|--------|

|                   |   |          |          |          |        |       |       |       |
|-------------------|---|----------|----------|----------|--------|-------|-------|-------|
| <b>sbp</b>        | 1 | 0.06627  | 0.00255  | 674.9832 | <.0001 | 1.069 | 1.063 | 1.074 |
| <b>smk_status</b> | 1 | -0.09745 | 0.01735  | 31.5363  | <.0001 | 0.907 | 0.877 | 0.939 |
| <b>packyear</b>   | 1 | 0.000182 | 0.000198 | 0.8479   | 0.3571 | 1     | 1     | 1.001 |
| <b>DRALC</b>      | 1 | -0.1035  | 0.01475  | 49.2331  | <.0001 | 0.902 | 0.876 | 0.928 |
| <b>units</b>      | 1 | 0.00263  | 0.000309 | 72.6921  | <.0001 | 1.003 | 1.002 | 1.003 |
| <b>BMI</b>        | 1 | -0.03125 | 0.00214  | 212.3536 | <.0001 | 0.969 | 0.965 | 0.973 |
| <b>iap</b>        | 1 | 0.51811  | 0.02238  | 536.0381 | <.0001 | 1.679 | 1.607 | 1.754 |
| <b>edugroup</b>   | 1 | -0.21661 | 0.01527  | 201.1181 | <.0001 | 0.805 | 0.781 | 0.83  |
| <b>MARRIED</b>    | 1 | -0.10509 | 0.016    | 43.1386  | <.0001 | 0.9   | 0.872 | 0.929 |
| <b>fvgroup</b>    | 1 | -0.14386 | 0.01283  | 125.6359 | <.0001 | 0.866 | 0.844 | 0.888 |

Table c2. 10mmHg increase in baseline SBP on the risk of CVD.

| variable          | DF | estimates | standard means | chisq    | Sig.   | HR    | 95% CI |       |
|-------------------|----|-----------|----------------|----------|--------|-------|--------|-------|
| <b>sbp</b>        | 1  | 0.14821   | 0.00395        | 1405.643 | <.0001 | 1.16  | 1.151  | 1.169 |
| <b>smk_status</b> | 1  | -0.0434   | 0.02938        | 2.1818   | 0.1397 | 0.958 | 0.904  | 1.014 |
| <b>packyear</b>   | 1  | -0.00013  | 0.000337       | 0.1434   | 0.7049 | 1     | 0.999  | 1.001 |
| <b>DRALC</b>      | 1  | -0.12428  | 0.02479        | 25.1285  | <.0001 | 0.883 | 0.841  | 0.927 |
| <b>units</b>      | 1  | 0.00387   | 0.000514       | 56.6805  | <.0001 | 1.004 | 1.003  | 1.005 |
| <b>BMI</b>        | 1  | 0.00098   | 0.00349        | 0.0789   | 0.7788 | 1.001 | 0.994  | 1.008 |
| <b>iap</b>        | 1  | 0.57647   | 0.03883        | 220.3788 | <.0001 | 1.78  | 1.649  | 1.92  |
| <b>edugroup</b>   | 1  | -0.17674  | 0.02593        | 46.4546  | <.0001 | 0.838 | 0.796  | 0.882 |
| <b>MARRIED</b>    | 1  | -0.11085  | 0.02624        | 17.8491  | <.0001 | 0.895 | 0.85   | 0.942 |
| <b>fvgroup</b>    | 1  | -0.10215  | 0.02169        | 22.1807  | <.0001 | 0.903 | 0.865  | 0.942 |

Table c3. 10mmHg increase in baseline SBP on the risk of IHD.

| variable          | DF | estimates | standard means | chisq   | Sig.   | HR    | 95% CI |       |
|-------------------|----|-----------|----------------|---------|--------|-------|--------|-------|
| <b>sbp</b>        | 1  | 0.07964   | 0.00961        | 68.6395 | <.0001 | 1.083 | 1.063  | 1.103 |
| <b>smk_status</b> | 1  | -0.09669  | 0.06136        | 2.483   | 0.1151 | 0.908 | 0.805  | 1.024 |
| <b>packyear</b>   | 1  | 8.93E-05  | 0.000784       | 0.013   | 0.9093 | 1     | 0.999  | 1.002 |
| <b>DRALC</b>      | 1  | -0.19643  | 0.0571         | 11.8357 | 0.0006 | 0.822 | 0.735  | 0.919 |
| <b>units</b>      | 1  | 0.00366   | 0.00128        | 8.1269  | 0.0044 | 1.004 | 1.001  | 1.006 |
| <b>BMI</b>        | 1  | 0.00769   | 0.00761        | 1.0213  | 0.3122 | 1.008 | 0.993  | 1.023 |
| <b>iap</b>        | 1  | 0.34863   | 0.07266        | 23.0239 | <.0001 | 1.417 | 1.229  | 1.634 |
| <b>edugroup</b>   | 1  | 0.02927   | 0.05339        | 0.3005  | 0.5836 | 1.03  | 0.927  | 1.143 |
| <b>MARRIED</b>    | 1  | -0.22092  | 0.05828        | 14.3689 | 0.0002 | 0.802 | 0.715  | 0.899 |
| <b>fvgroup</b>    | 1  | 0.04352   | 0.04729        | 0.8471  | 0.3574 | 1.044 | 0.952  | 1.146 |

Table c4. 10mmHg increase in baseline SBP on the risk of stroke.

| variable          | DF | estimates | standard means | chisq    | Sig.   | HR    | 95% CI |       |
|-------------------|----|-----------|----------------|----------|--------|-------|--------|-------|
| <b>sbp</b>        | 1  | 0.179     | 0.00494        | 1314.474 | <.0001 | 1.196 | 1.185  | 1.208 |
| <b>smk_status</b> | 1  | -0.03163  | 0.03864        | 0.67     | 0.4131 | 0.969 | 0.898  | 1.045 |
| <b>packyear</b>   | 1  | 0.000147  | 0.000436       | 0.1128   | 0.737  | 1     | 0.999  | 1.001 |
| <b>DRALC</b>      | 1  | -0.10151  | 0.03165        | 10.2895  | 0.0013 | 0.903 | 0.849  | 0.961 |
| <b>units</b>      | 1  | 0.00447   | 0.000642       | 48.5895  | <.0001 | 1.004 | 1.003  | 1.006 |
| <b>BMI</b>        | 1  | 0.004     | 0.00449        | 0.7918   | 0.3735 | 1.004 | 0.995  | 1.013 |
| <b>iap</b>        | 1  | 0.69012   | 0.05359        | 165.8388 | <.0001 | 1.994 | 1.795  | 2.215 |
| <b>edugroup</b>   | 1  | -0.25556  | 0.03421        | 55.7927  | <.0001 | 0.774 | 0.724  | 0.828 |
| <b>MARRIED</b>    | 1  | -0.04426  | 0.03416        | 1.6779   | 0.1952 | 0.957 | 0.895  | 1.023 |
| <b>fvgroup</b>    | 1  | -0.19578  | 0.02856        | 46.9955  | <.0001 | 0.822 | 0.777  | 0.87  |

**Table c5.** 10mmHg increase in baseline DBP on the risk of all cause mortality.

| variable          | DF | estimates | standard means | chisq    | Sig.   | HR    | 95% CI |       |
|-------------------|----|-----------|----------------|----------|--------|-------|--------|-------|
| <b>dbp</b>        | 1  | 0.11449   | 0.00423        | 733.1447 | <.0001 | 1.121 | 1.112  | 1.131 |
| <b>smk_status</b> | 1  | -0.10174  | 0.01735        | 34.3752  | <.0001 | 0.903 | 0.873  | 0.935 |
| <b>packyear</b>   | 1  | 0.000256  | 0.000198       | 1.6771   | 0.1953 | 1     | 1      | 1.001 |
| <b>DRALC</b>      | 1  | -0.10613  | 0.01475        | 51.747   | <.0001 | 0.899 | 0.874  | 0.926 |
| <b>units</b>      | 1  | 0.00266   | 0.000309       | 74.0611  | <.0001 | 1.003 | 1.002  | 1.003 |
| <b>BMI</b>        | 1  | -0.03144  | 0.00214        | 215.0235 | <.0001 | 0.969 | 0.965  | 0.973 |
| <b>iap</b>        | 1  | 0.52118   | 0.02239        | 541.7376 | <.0001 | 1.684 | 1.612  | 1.76  |
| <b>edugroup</b>   | 1  | -0.21374  | 0.01528        | 195.6373 | <.0001 | 0.808 | 0.784  | 0.832 |
| <b>MARRIED</b>    | 1  | -0.10264  | 0.016          | 41.1375  | <.0001 | 0.902 | 0.875  | 0.931 |
| <b>fvgroup</b>    | 1  | -0.13722  | 0.01284        | 114.1994 | <.0001 | 0.872 | 0.85   | 0.894 |

**Table c6.** 10mmHg increase in baseline DBP on the risk of CVD.

| variable          | DF | estimates | standard means | chisq    | Sig.   | HR    | 95% CI |       |
|-------------------|----|-----------|----------------|----------|--------|-------|--------|-------|
| <b>dbp</b>        | 1  | 0.2363    | 0.00683        | 1197.366 | <.0001 | 1.267 | 1.25   | 1.284 |
| <b>smk_status</b> | 1  | -0.05435  | 0.02938        | 3.4225   | 0.0643 | 0.947 | 0.894  | 1.003 |
| <b>packyear</b>   | 1  | 0.000045  | 0.000335       | 0.018    | 0.8934 | 1     | 0.999  | 1.001 |
| <b>DRALC</b>      | 1  | -0.12977  | 0.02479        | 27.4009  | <.0001 | 0.878 | 0.837  | 0.922 |
| <b>units</b>      | 1  | 0.004     | 0.000514       | 60.6706  | <.0001 | 1.004 | 1.003  | 1.005 |
| <b>BMI</b>        | 1  | 0.00254   | 0.00349        | 0.5295   | 0.4668 | 1.003 | 0.996  | 1.009 |
| <b>iap</b>        | 1  | 0.58826   | 0.03888        | 228.8945 | <.0001 | 1.801 | 1.669  | 1.943 |
| <b>edugroup</b>   | 1  | -0.16746  | 0.02596        | 41.5971  | <.0001 | 0.846 | 0.804  | 0.89  |
| <b>MARRIED</b>    | 1  | -0.11234  | 0.02623        | 18.3463  | <.0001 | 0.894 | 0.849  | 0.941 |
| <b>fvgroup</b>    | 1  | -0.08973  | 0.02168        | 17.1232  | <.0001 | 0.914 | 0.876  | 0.954 |

**Table c7.** 10mmHg increase in baseline DBP on the risk of IHD.

| variable          | DF | estimates | standard means | chisq   | Sig.   | HR    | 95% CI |       |
|-------------------|----|-----------|----------------|---------|--------|-------|--------|-------|
| <b>dbp</b>        | 1  | 0.10517   | 0.01614        | 42.4811 | <.0001 | 1.111 | 1.076  | 1.147 |
| <b>smk_status</b> | 1  | -0.10252  | 0.06134        | 2.7937  | 0.0946 | 0.903 | 0.8    | 1.018 |
| <b>packyear</b>   | 1  | 0.00019   | 0.000783       | 0.059   | 0.8082 | 1     | 0.999  | 1.002 |
| <b>DRALC</b>      | 1  | -0.20021  | 0.05708        | 12.3033 | 0.0005 | 0.819 | 0.732  | 0.915 |
| <b>units</b>      | 1  | 0.0038    | 0.00128        | 8.8116  | 0.003  | 1.004 | 1.001  | 1.006 |
| <b>BMI</b>        | 1  | 0.01015   | 0.0076         | 1.7817  | 0.1819 | 1.01  | 0.995  | 1.025 |
| <b>iap</b>        | 1  | 0.35786   | 0.07269        | 24.2401 | <.0001 | 1.43  | 1.24   | 1.649 |
| <b>edugroup</b>   | 1  | 0.03329   | 0.05343        | 0.3883  | 0.5332 | 1.034 | 0.931  | 1.148 |
| <b>MARRIED</b>    | 1  | -0.22424  | 0.05826        | 14.8152 | 0.0001 | 0.799 | 0.713  | 0.896 |
| <b>fvgroup</b>    | 1  | 0.04983   | 0.04727        | 1.1115  | 0.2918 | 1.051 | 0.958  | 1.153 |

**Table c8.** 10mmHg increase in baseline DBP on the risk of stroke.

| variable          | DF | estimates | standard means | chisq    | Sig.   | HR    | 95% CI |       |
|-------------------|----|-----------|----------------|----------|--------|-------|--------|-------|
| <b>dbp</b>        | 1  | 0.29652   | 0.0086         | 1188.616 | <.0001 | 1.345 | 1.323  | 1.368 |
| <b>smk_status</b> | 1  | -0.04367  | 0.03864        | 1.2773   | 0.2584 | 0.957 | 0.887  | 1.033 |
| <b>packyear</b>   | 1  | 0.000328  | 0.000433       | 0.5724   | 0.4493 | 1     | 0.999  | 1.001 |
| <b>DRALC</b>      | 1  | -0.10641  | 0.03164        | 11.3095  | 0.0008 | 0.899 | 0.845  | 0.957 |
| <b>units</b>      | 1  | 0.00454   | 0.000643       | 49.9913  | <.0001 | 1.005 | 1.003  | 1.006 |
| <b>BMI</b>        | 1  | 0.00526   | 0.00449        | 1.3692   | 0.242  | 1.005 | 0.996  | 1.014 |
| <b>iap</b>        | 1  | 0.70419   | 0.05365        | 172.2549 | <.0001 | 2.022 | 1.82   | 2.246 |
| <b>edugroup</b>   | 1  | -0.24389  | 0.03427        | 50.6638  | <.0001 | 0.784 | 0.733  | 0.838 |
| <b>MARRIED</b>    | 1  | -0.04709  | 0.03415        | 1.902    | 0.1679 | 0.954 | 0.892  | 1.02  |
| <b>fvgroup</b>    | 1  | -0.1826   | 0.02855        | 40.9095  | <.0001 | 0.833 | 0.788  | 0.881 |

#from Table c1 to Table c8, pack years 1 = 0.1–19 pack years, pack years 2 = equal to or more than 20 pack years, smk\_status = (0 = never smoked, 1 = formerly smoked, 2 = currently smoke), DRALC represents drinking alcohol regularly (0 = no (reference), 1 = yes), units represents the amount of drinking (drink, one drink is about 14g of pure alcohol), BMI equals to weight (Kg)/height (m)<sup>2</sup>, iap represents indoor air pollution (0 = not exposed to indoor pollution (reference), 1 = exposed to indoor pollution), edugroup represents education level (0 = less than six years (reference), 1 = equal to or more than six years), married represents marital status (0 = not married (reference), 1 = married), fvgroup represents consumption of fruit and vegetables regularly (0 = no (reference), 1 = yes).
